# Supplementary material for: The first Brazilian bovine breed: structure and genetic diversity of the Curraleiro Pé-duro
Source: PeerJ journal article supplement (doi:10.7717/peerj.14768), 2023-04-11

Frontal images of some animals sampled to illustrate the appearance of Curraleiro Pé-Duro cattle. (Photographer Mérik Rocha Silva)

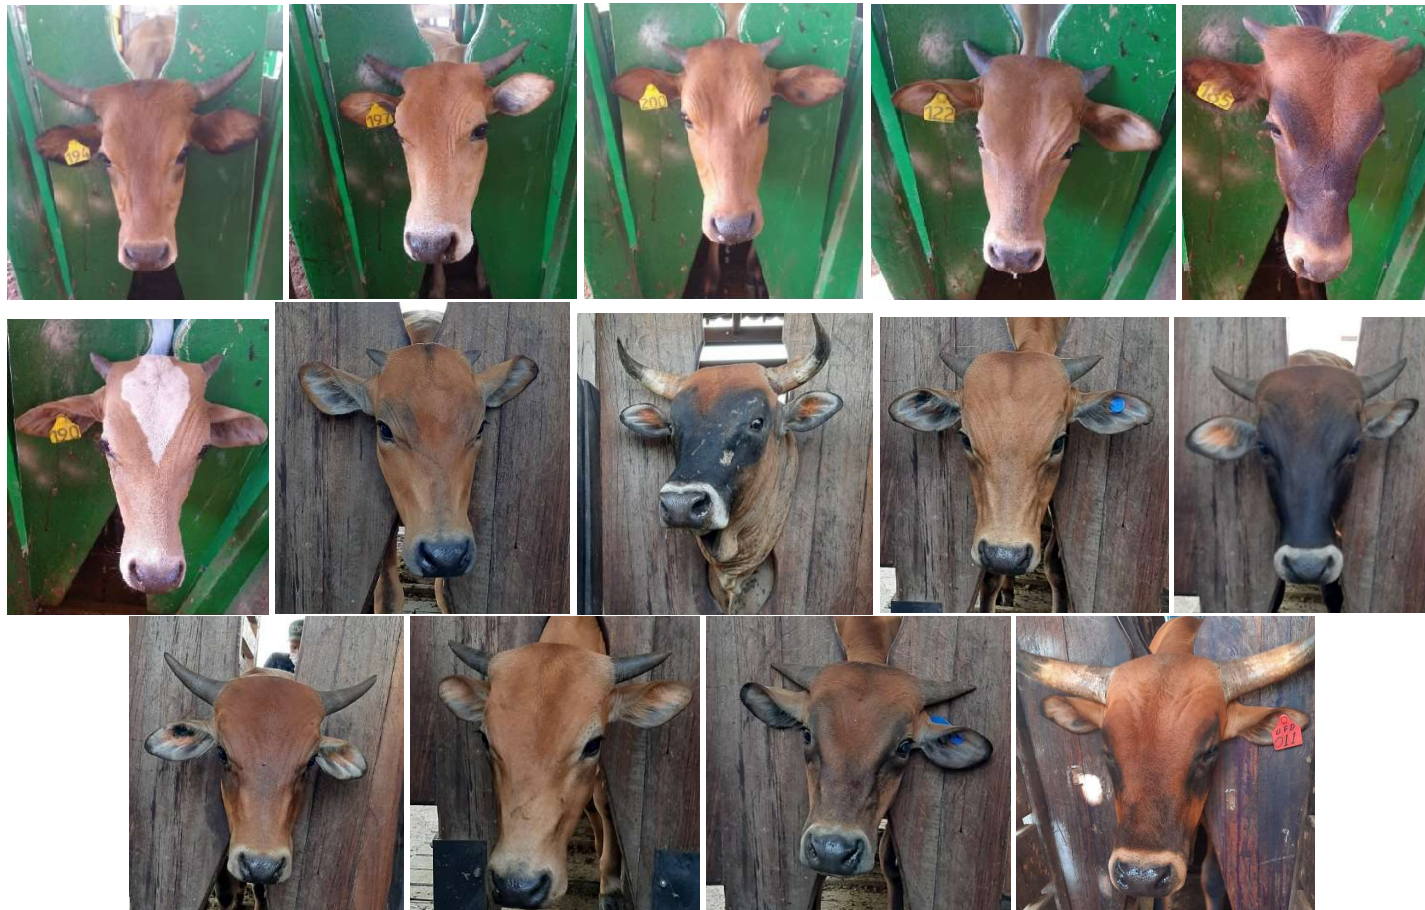

Supplement: Frontal_images.pdf [file Frontal_images.pdf]
