# Supplementary material for: The first Brazilian bovine breed: structure and genetic diversity of the Curraleiro Pé-duro
Source: PeerJ journal article supplement (doi:10.7717/peerj.14768), 2023-04-11
Supplement: Parameters_tested.pdf [file Parameters_tested.pdf]

**Parameters tested in Software Structure and CLUMPAK main pipeline summary**

| Parameter                               | Analysis round       |                      |                             |                      |                      |
|-----------------------------------------|----------------------|----------------------|-----------------------------|----------------------|----------------------|
|                                         | 1 <sup>st</sup>      | 2 <sup>nd</sup>      | 3 <sup>rd</sup>             | 4 <sup>th</sup>      | 5 <sup>th</sup>      |
| Burnin                                  | 1,000                | 10,000               | 10,000                      | 100,000              | 200,000              |
| interactions (MCMC)                     | 5,000                | 50,000               | 50,000                      | 500,000              | 1,000,000            |
| Single alpha ( <i>Admixture Model</i> ) | Yes                  | Yes                  | No                          | Yes                  | Yes                  |
| Interactions                            | 20                   | 20                   | 20                          | 20                   | 20                   |
| K=1                                     | 20/20                | 20/20                | 20/20                       | 20/20                | 20/20                |
| K=2                                     | 20/20                | 20/20                | 20/20                       | 20/20                | 20/20                |
| K=3                                     | 10/20, 10/20         | 11/20, 9/20          | 11/20, 9/20                 | 11/20, 9/20          | 9/20, 6/20, 5/20     |
| K=4                                     | 12/20, 5/20,<br>3/20 | 12/20, 8/20          | 14/20, 5/20                 | <b>20/20</b>         | <b>20/20</b>         |
| K=5                                     | 9/20, 8/20, 3/20     | 10/20, 10/20         | 9/20, 6/20, 5/20            | 15/20, 3/20,<br>2/20 | 11/20, 9/20          |
| K=6                                     | 17/20, 2/20          | 16/20, 2/20          | 12/20, 6/20,<br>2/20        | <b>20/20</b>         | <b>20/20</b>         |
| K=7                                     | 18/20                | <b>20/20</b>         | 9/20, 8/20, 3/20            | 20/20                | 20/20                |
| K=8                                     | 14/20, 6/20          | 8/20, 6/20, 6/20     | 18/20                       | 14/20, 4/20,<br>2/20 | 14/20, 4/20,<br>2/20 |
| K=9                                     | 10/20, 8/20,<br>2/20 | 11/20, 6/20,<br>3/20 | 11/20, 5/20,<br>2/20, 2/20, | 15/20, 4/20          | 14/20, 2/20,<br>2/20 |
| K=10                                    | 20/20                | 16/20, 2/20,<br>2/20 | 9/20, 6/20, 4/20            | 16/20, 2/20,<br>2/20 | 12/20, 4/20,<br>3/20 |
| Best K (Puechmaille Method)             | 2                    | 2                    | 2                           | 2                    | 2                    |
| Best K (Evanno method)                  | 7                    | 2                    | 2                           | 2                    | 2                    |
